# Supplementary material
Source: PubMed Central journal article supplement (PMC7778650)
Supplement: 13205_2020_2555_MOESM1_ESM.pdf [file 13205_2020_2555_MOESM1_ESM.pdf]

## Chromosomal distribution of the NHX genes in *Glycine max*.

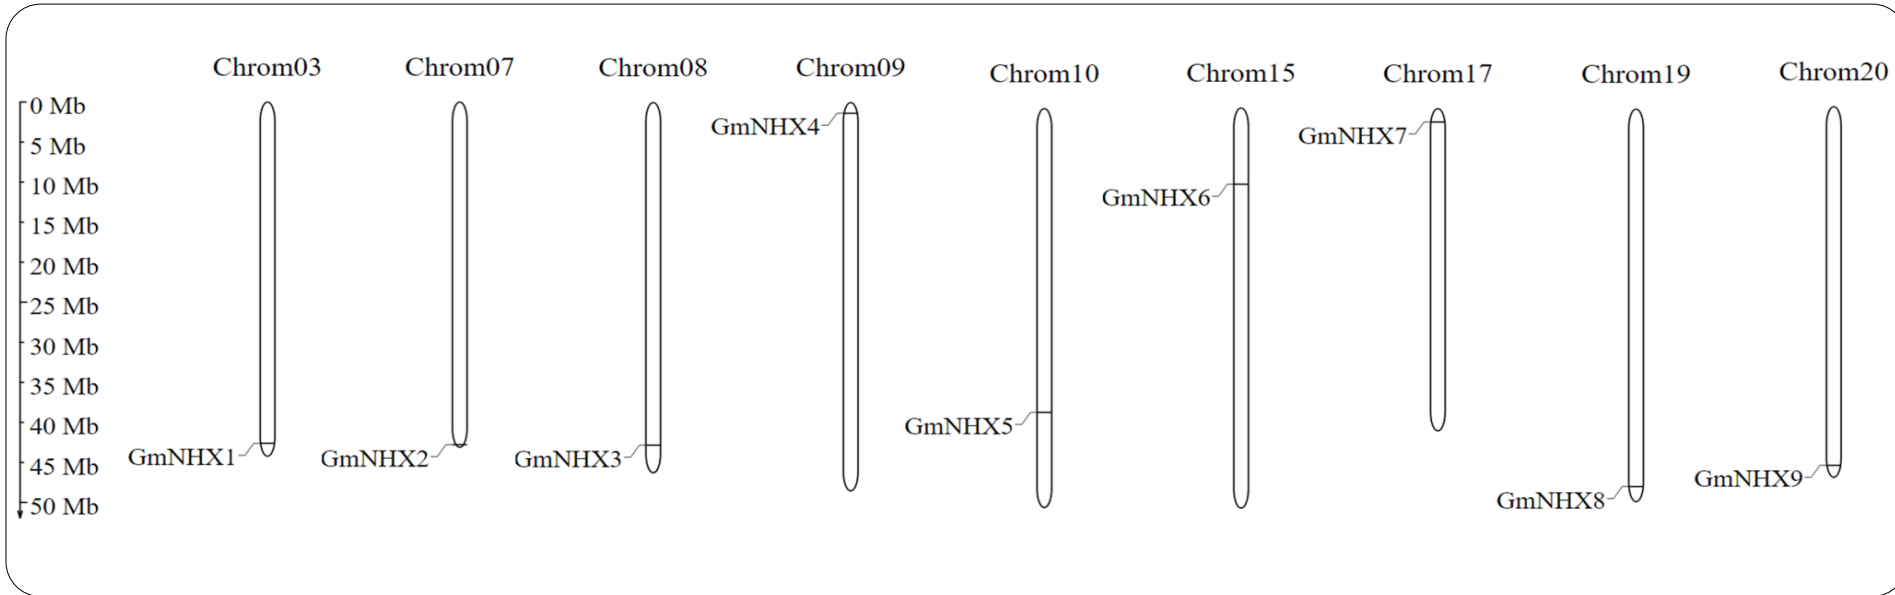

The chromosomal coordinates of GmNHXs were retrieved from the *Glycine max* genome (*Glycine\_max\_v2.1*) at the Gramene database (<http://www.gramene.org/>) and the chromosomal location of the genes was physically mapped using MapGene2Chromosome v2 ([http://mg2c.iask.in/mg2c\\_v2.0/](http://mg2c.iask.in/mg2c_v2.0/)). The number of each chromosome is mentioned on the top. The scale of the genome size is mentioned to the left.
