# Supplementary material
Source: PubMed Central journal article supplement (PMC7778650)
Supplement: 13205_2020_2555_MOESM2_ESM.pdf [file 13205_2020_2555_MOESM2_ESM.pdf]

## Phosphorylation sites/kinases identified in the GmNHXs.

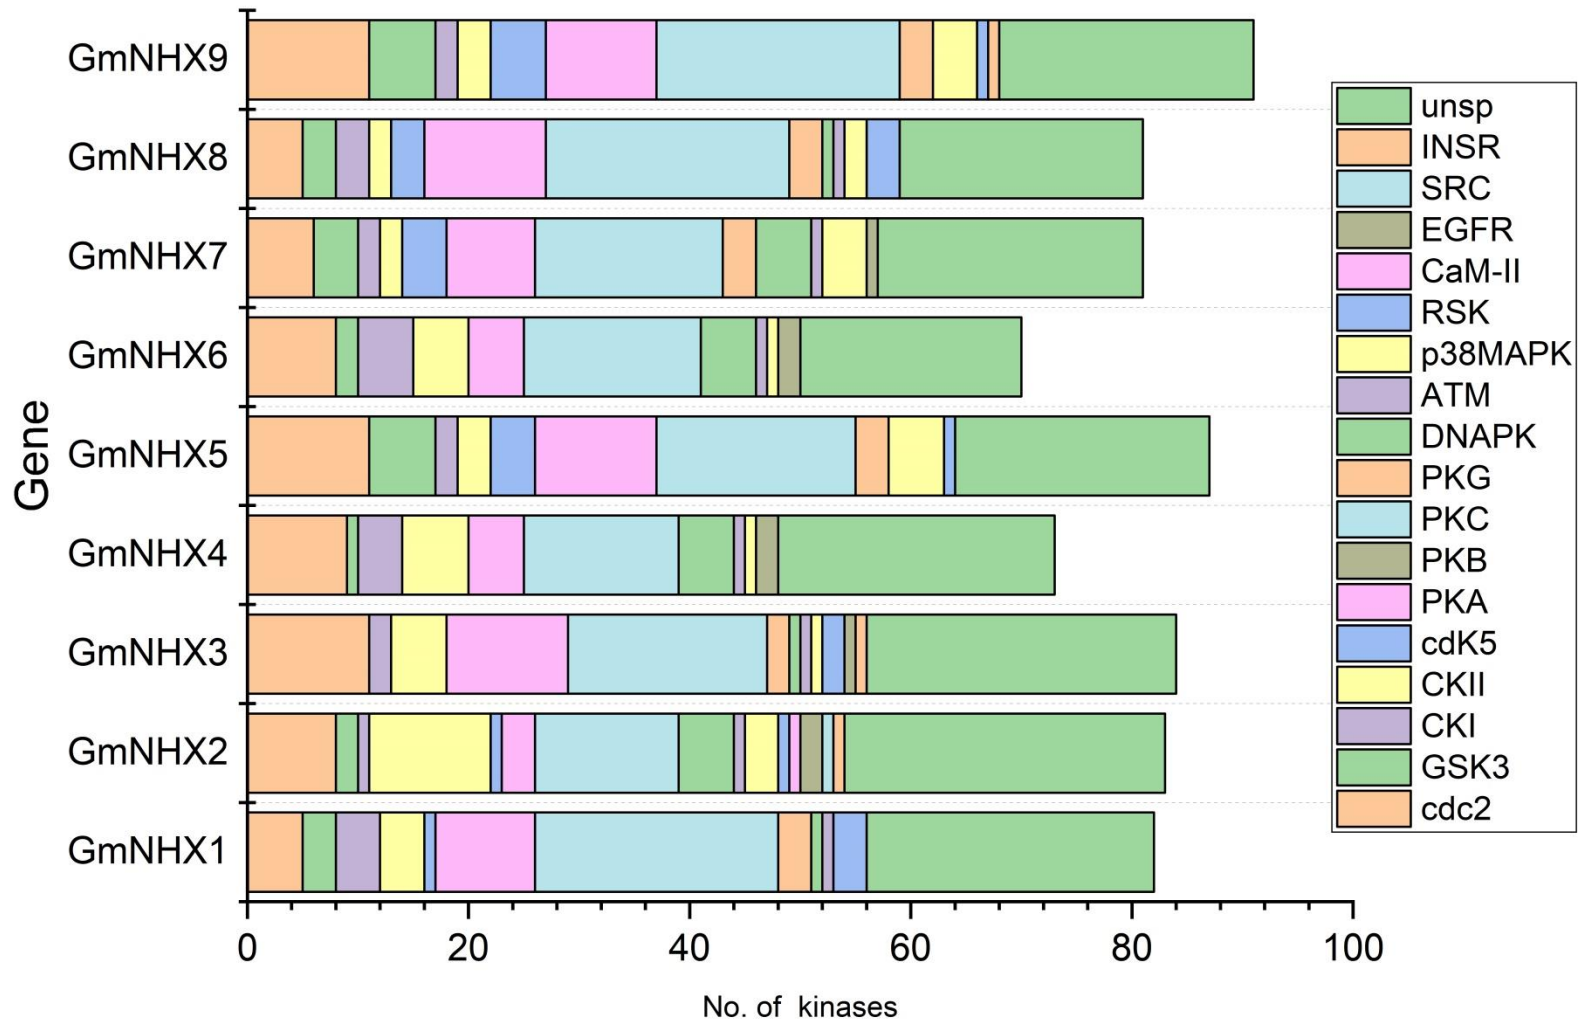

(cdc2: A-type cyclin-dependent kinases, glycogen synthase kinase 3, CK: casein kinase, cdK5: cyclin dependent kinase 5, PKA/B/C/G: protein kinase A/B/C/G, DNAPK: DNA-dependent protein kinase, ATM: ataxia telangiectasia mutated, p38MAPK: p38 mitogen-activated protein kinase, RSK: ribosomal S6 kinase, CaMII: calmodulin-dependent protein kinase II, EGFR: epidermal growth factor receptor, SRC: src tyrosine protein kinase, INSR: insulin receptor tyrosine kinase)
