# Supplementary material
Source: PubMed Central journal article supplement (PMC7778650)
Supplement: 13205_2020_2555_MOESM3_ESM.pdf [file 13205_2020_2555_MOESM3_ESM.pdf]

## Prediction of the secondary structural elements with respect to the peptide sequence.

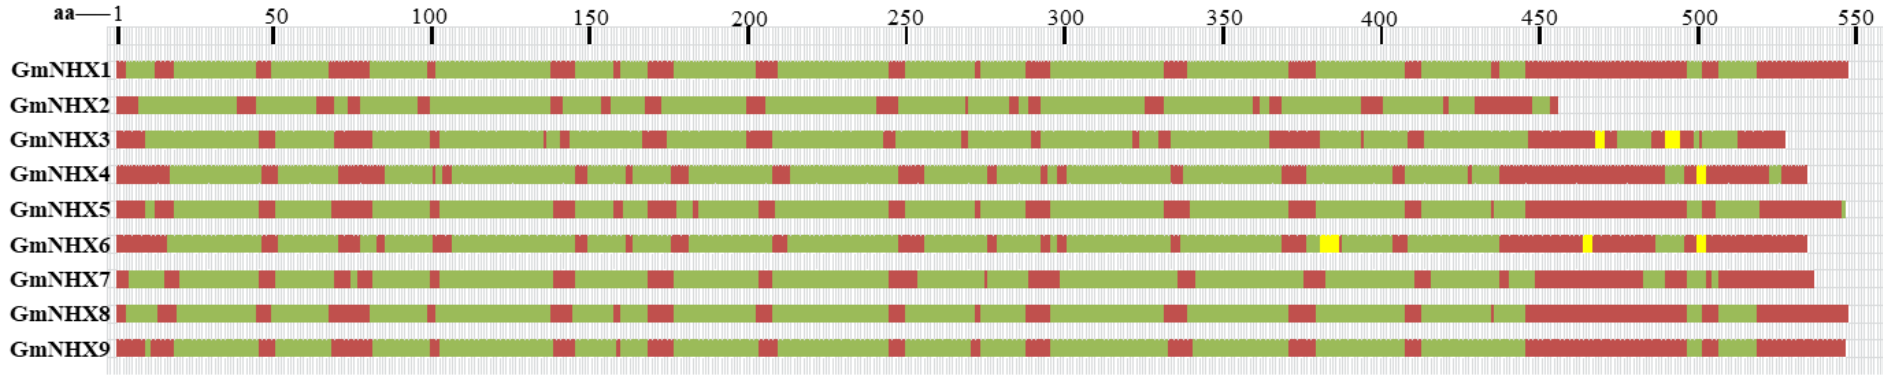

Green region denotes helices, red region denotes coils and yellow region denotes strands in the protein. The numbers mentioned on the top represent the number of amino acid.
