# Supplementary material
Source: PubMed Central journal article supplement (PMC7778650)

# Prediction of transmembrane helices in GmNHXs using TMHMM

[Number and arrangement of the transmembrane helices]

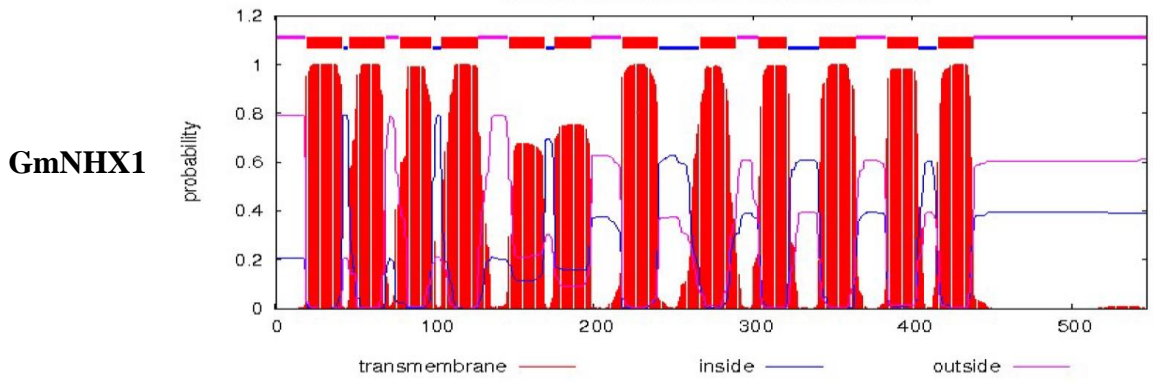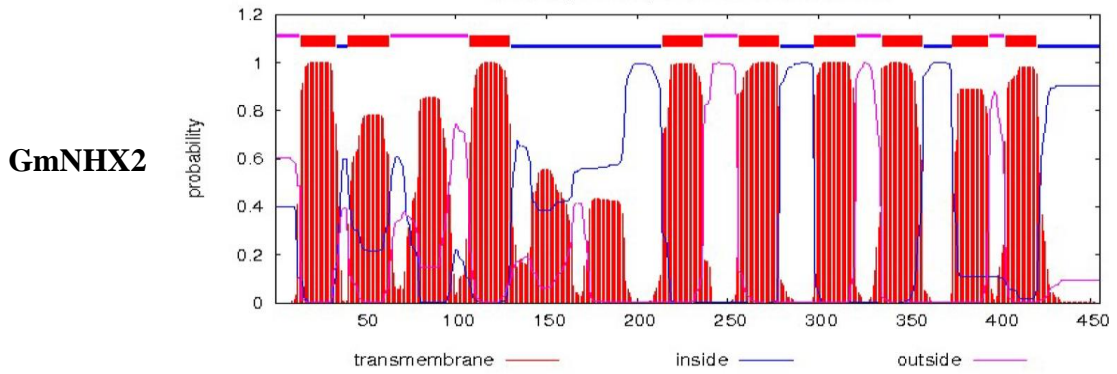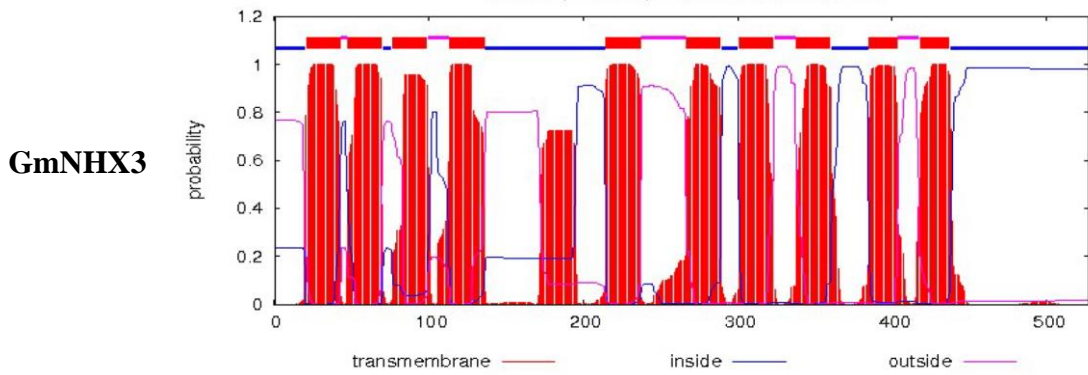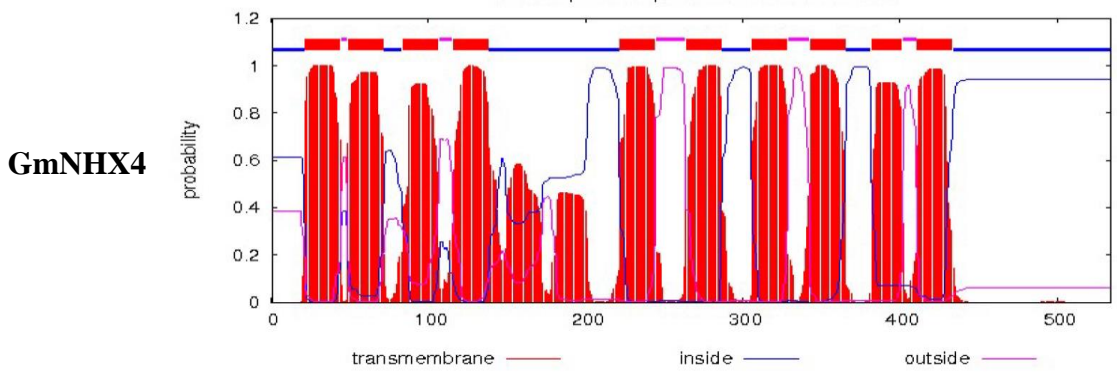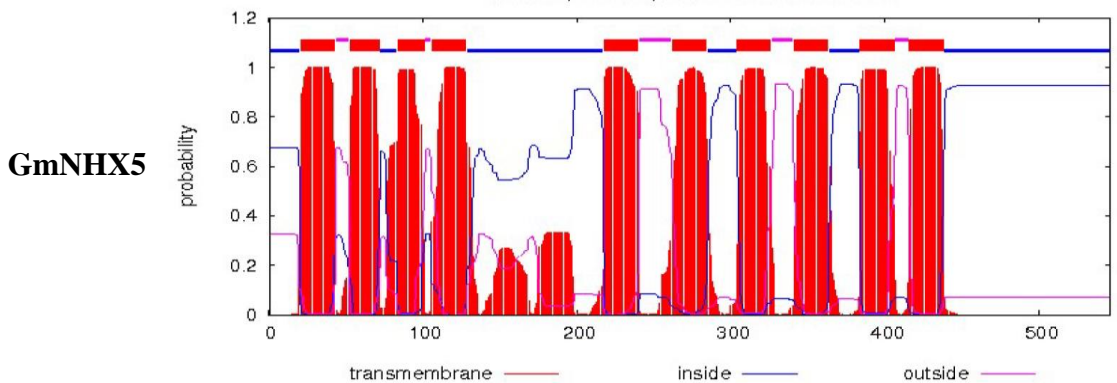

**GmNHX6**

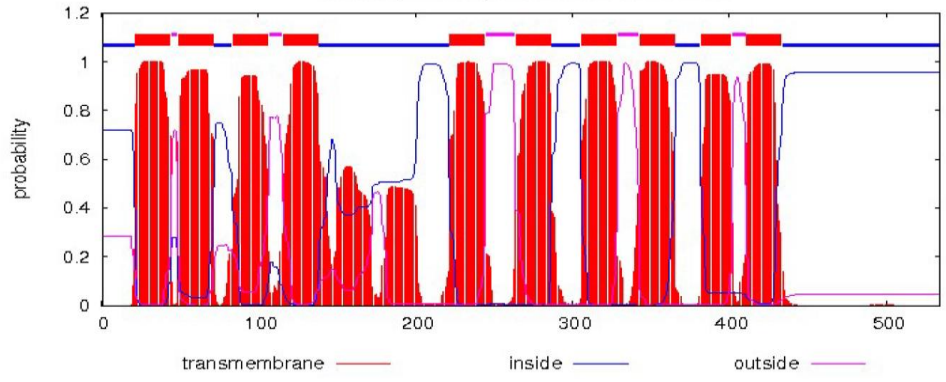

**GmNHX7**

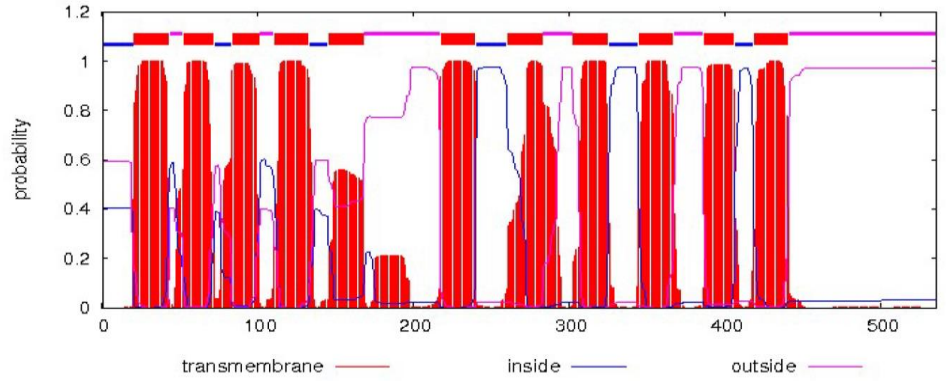

**GmNHX8**

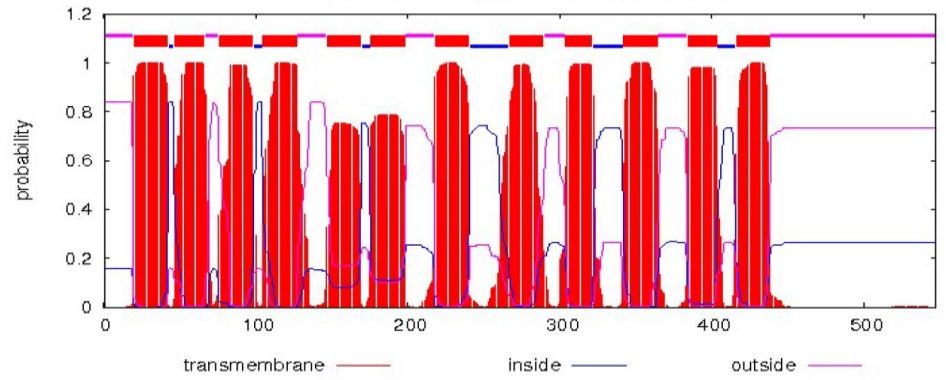

**GmNHX9**

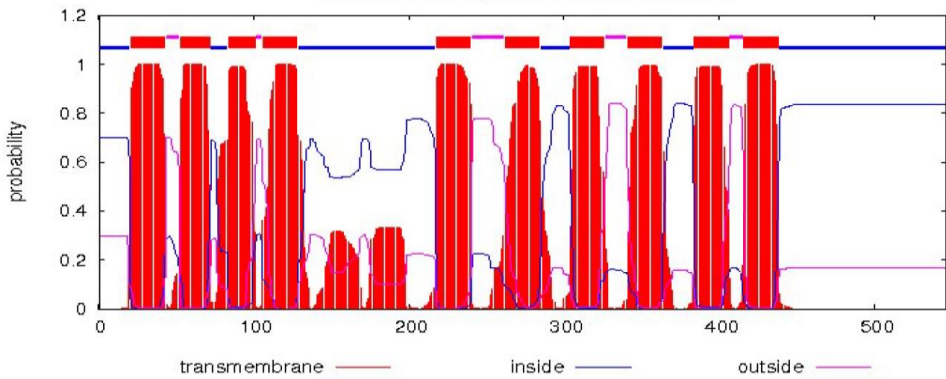

Supplement: 13205_2020_2555_MOESM4_ESM.pdf [file 13205_2020_2555_MOESM4_ESM.pdf]
