# Supplementary material
Source: PubMed Central journal article supplement (PMC7778650)

# Transmembrane helix topology of GmNHXs

[Prediction of the positioning of amino acid chain across the cytoplasm-membrane-extracellular matrix]

9ed127f8-f246-11e9-8a9f-00163e100d53

## GmNHX1

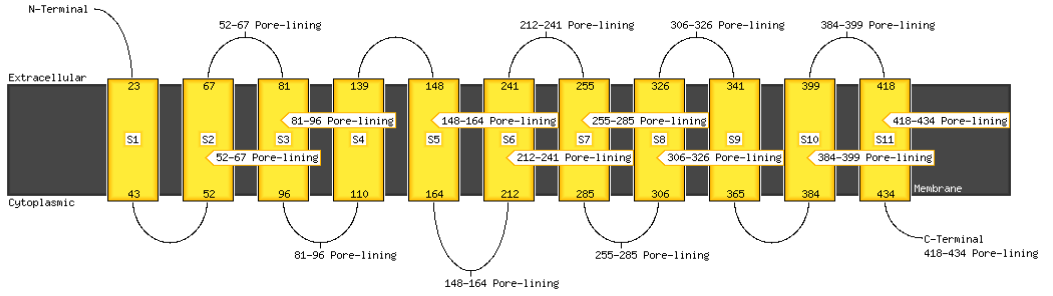

8cc61492-f480-11e9-88de-00163e100d53

## GmNHX2

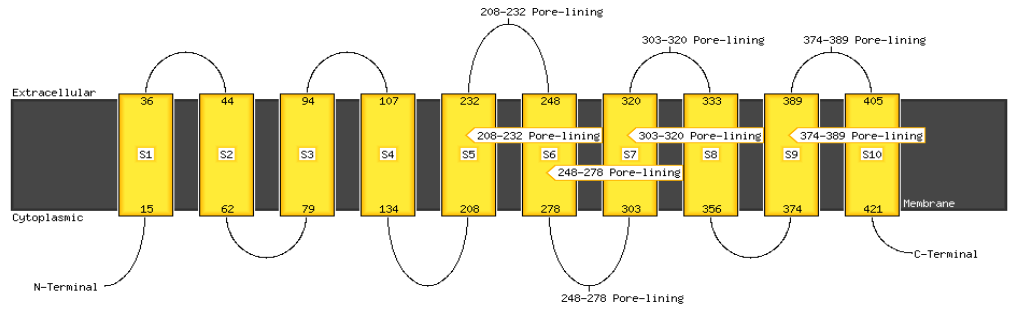

81f7a9da-f481-11e9-a29b-00163e100d53

## GmNHX3

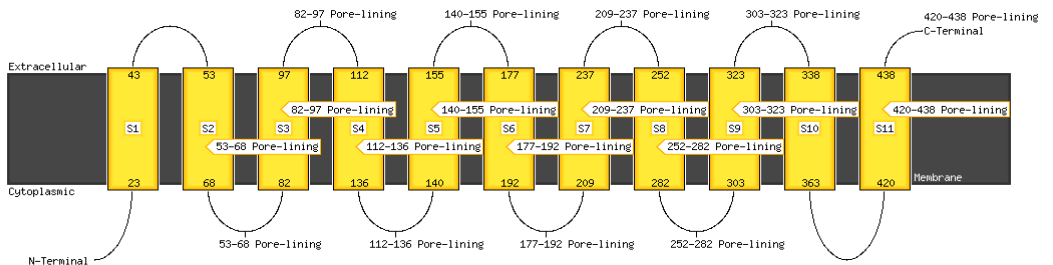

f5905540-f481-11e9-b2f7-00163e100d53

## GmNHX4

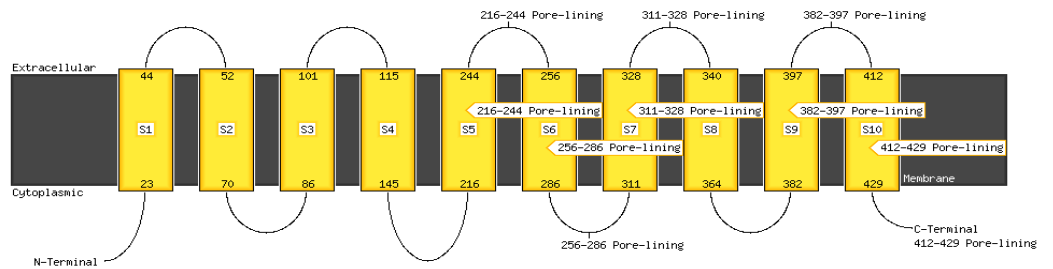

9084d24c-f482-11e9-8302-00163e100d53

## GmNHX5

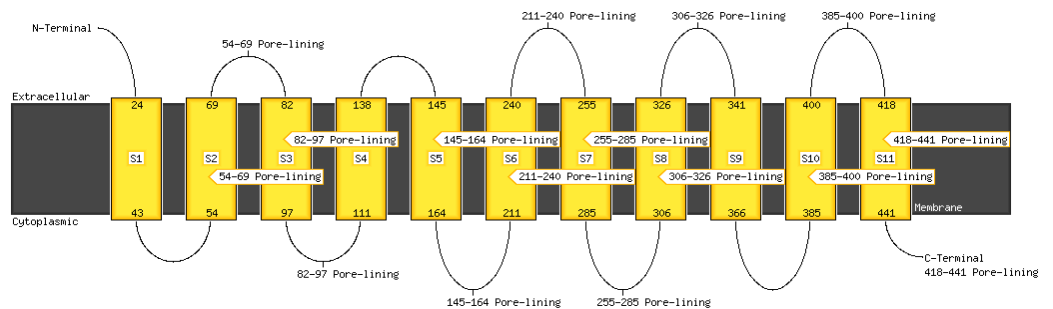

FF422dbc-F48F-11e9-8a8a-00163e100d53

## GmNHX6

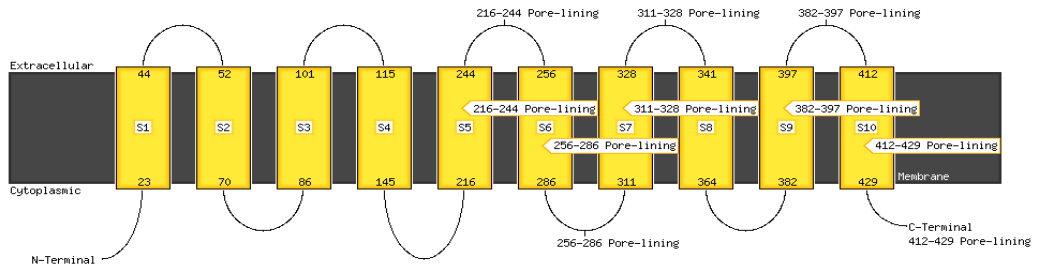

cc9740f4-F490-11e9-b467-00163e100d53

## GmNHX7

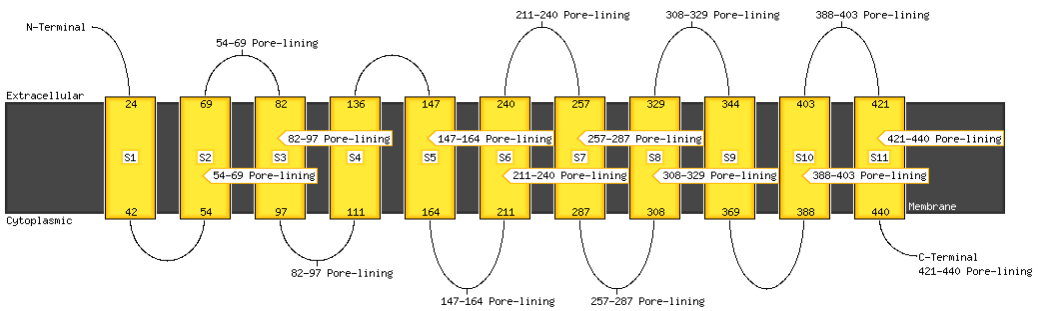

3f6f1c50-F491-11e9-8302-00163e100d53

## GmNHX8

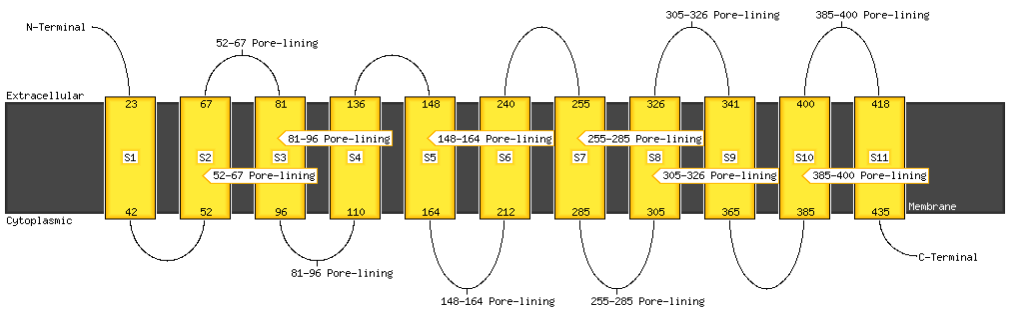

58e8b22a-F493-11e9-8302-00163e100d53

## GmNHX9

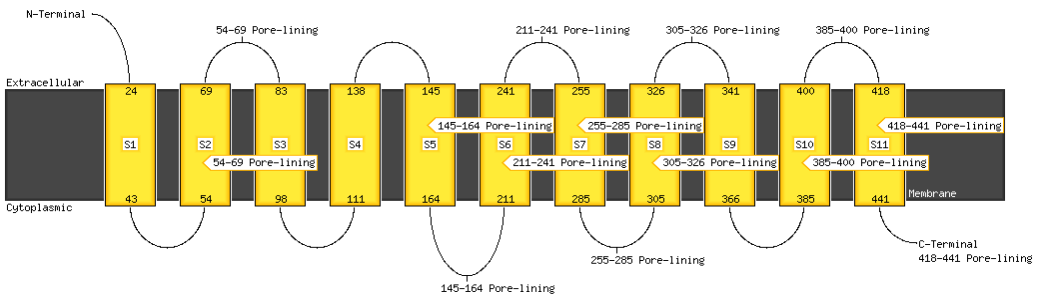

Supplement: 13205_2020_2555_MOESM5_ESM.pdf [file 13205_2020_2555_MOESM5_ESM.pdf]
