# Supplementary material
Source: PubMed Central journal article supplement (PMC7778650)
Supplement: 13205_2020_2555_MOESM6_ESM.pdf [file 13205_2020_2555_MOESM6_ESM.pdf]

# Multiple sequence alignment of identified NHXs peptides in *G. max* (GmNHX1-9)

[Alignment highlighted by the black rectangle indicates the motif sequences described with the Na<sub>+</sub>/H<sup>+</sup> Exchanger activity (Pfam)]

|        | 1     | 10          | 20         | 30      | 40      | 50     |
|--------|-------|-------------|------------|---------|---------|--------|
| GmNHX2 | ...MM | EEDGTSKEQQQ | AAGVGI     | LQIMMLV | LSFV    | LGHVLR |
| GmNHX4 | MTSEL | EISPAD      | TRKAPGKEQQ | AAGVGI  | LQIMMLV | LSFV   |
| GmNHX6 | MASEL | EISPAD      | ARKAPGKEQQ | AAGVGI  | LQIMMLV | LSFV   |
| GmNHX3 | MGMVP | .VNL        | IPEVLRNLV  | HEH     | ALVVP   | ISL    |
| GmNHX7 | MAVEA | .LY         | LDKLT      | VTMTSDH | ASVSM   | NLF    |
| GmNHX5 | MVFEI | .SS         | VVSKLQ     | TLSTSDH | ASVSM   | NLF    |
| GmNHX9 | MVFEI | .ST         | VVSKLQ     | TLSTSDH | ASVSM   | NLF    |
| GmNHX1 | MGGEL | .SY         | VLSKME     | .MLTSDH | ASVSM   | NLF    |
| GmNHX8 | MGGEL | .SY         | VLSKME     | .MLTSDH | ASVSM   | NLF    |

|        | 60    | 70     | 80     | 90    | 100   | 110   |
|--------|-------|--------|--------|-------|-------|-------|
| GmNHX2 | IGLV  | GTLAN  | ISHTQT | SIR   | RAWFN | FHEEF |
| GmNHX4 | IGLV  | GILANI | ISDTE  | SIR   | RGWFN | FHEEF |
| GmNHX6 | IGLV  | GILANI | ISDTE  | NIR   | RAWFN | FHEEF |
| GmNHX3 | VGFI  | GIIL   | LVTKG  | SSH   | .ILTF | NEEL  |
| GmNHX7 | IGLV  | CTGV   | VLFTTG | GKSSH | .ILV  | FSEDL |
| GmNHX5 | IGVCT | GVVIL  | LFSG   | GKSSH | .ILV  | FSEDL |
| GmNHX9 | IGVCT | GIVIL  | LFSG   | GKSSH | .ILV  | FSEDL |
| GmNHX1 | IGICT | GVVIL  | LLSR   | GKSSH | .LLV  | FSEDL |
| GmNHX8 | IGICT | GIVIL  | LLSR   | GKSSH | .LLV  | FSEDL |

**Motif 2**

|        | 120   | 130   | 140   | 150  | 160   |
|--------|-------|-------|-------|------|-------|
| GmNHX2 | AIFGT | FIASI | VTGVL | VYLG | GLMY  |
| GmNHX4 | AIFGT | FIASI | VTGIL | VYLG | GLLF  |
| GmNHX6 | AIFGT | FIASI | VTGIL | VYLG | GLLF  |
| GmNHX3 | GVI   | GVFIS | VSITC | .... | GSWW  |
| GmNHX7 | GAVGT | LISFC | IISL  | .... | GAIHF |
| GmNHX5 | GAI   | GTI   | ISCT  | IITL | ....  |
| GmNHX9 | GAI   | GTI   | ISCT  | IITL | ....  |
| GmNHX1 | GAVGT | LISCS | IITF  | .... | GVTQ  |
| GmNHX8 | GAVGT | LISCS | IITF  | .... | GVTQ  |

|        | 170 | 180 | 190  | 200   | 210 | 220   |
|--------|-----|-----|------|-------|-----|-------|
| GmNHX2 | LGT | DVN | LYAL | LVFGE | SVL | NDAMA |
| GmNHX4 | LGT | DVN | LYAL | LVFGE | SVL | NDAMA |
| GmNHX6 | LGT | DVN | LYAL | LVFGE | SVL | NDAMA |
| GmNHX3 | DET | PL  | LYS  | LVFGE | GVV | NDATS |
| GmNHX7 | DET | PL  | LYS  | LVFGE | GVV | NDATS |
| GmNHX5 | DET | PL  | LYS  | LVFGE | GVV | NDATS |
| GmNHX9 | DET | PL  | LYS  | LVFGE | GVV | NDATS |
| GmNHX1 | DET | PL  | LYS  | LVFGE | GVV | NDATS |
| GmNHX8 | DET | PL  | LYS  | LVFGE | GVV | NDATS |

**Motif 4**

|        | 230 | 240  | 250   | 260   | 270     | 280   |
|--------|-----|------|-------|-------|---------|-------|
| GmNHX2 | VGV | GFIS | ALLFK | ..YAG | LDID    | NLQNL |
| GmNHX4 | VGV | GFIS | ALLFK | ..YAG | LDID    | NLQNL |
| GmNHX6 | VGV | GFIS | ALLFK | ..YAG | LDID    | NLQNL |
| GmNHX3 | VIT | GLLT | AYIL  | KALS  | FG..RHS | SVRE  |
| GmNHX7 | IFA | GLLS | AYIK  | KLYFG | KLIRHS  | TDRE  |
| GmNHX5 | VLT | GLLS | AYIK  | KLYIG | ..RHS   | TDRE  |
| GmNHX9 | VLT | GLLS | AYIK  | KLYIG | ..RHS   | TDRE  |
| GmNHX1 | VLA | GLLS | AYIK  | KLYIG | ..RHS   | TDRE  |
| GmNHX8 | VLA | GLLS | AYIK  | KLYIG | ..RHS   | TDRE  |

**Motif 1**

|        | 290 | 300 | 310  | 320  | 330   |
|--------|-----|-----|------|------|-------|
| GmNHX2 | KHY | TSN | LSR  | SSQR | FVSAF |
| GmNHX4 | KHY | TSN | LSR  | SSQR | FVSAF |
| GmNHX6 | KHY | TSN | LSR  | SSQR | FVSAF |
| GmNHX3 | SHY | AWN | VTET | SRIT | TRHV  |
| GmNHX7 | SHY | TWH | NVTE | SRIT | TKHV  |
| GmNHX5 | SHY | TWH | NVTE | SRIT | TKHS  |
| GmNHX9 | SHY | TWH | NVTE | SRIT | TKHS  |
| GmNHX1 | SHY | TWH | NVTE | SRIT | TKHA  |
| GmNHX8 | SHY | TWH | NVTE | SRIT | TKHA  |
