# Supplementary material
Source: PubMed Central journal article supplement (PMC7778650)

Distribution of the SSRs from the genomic transcripts of the GmNHXs.

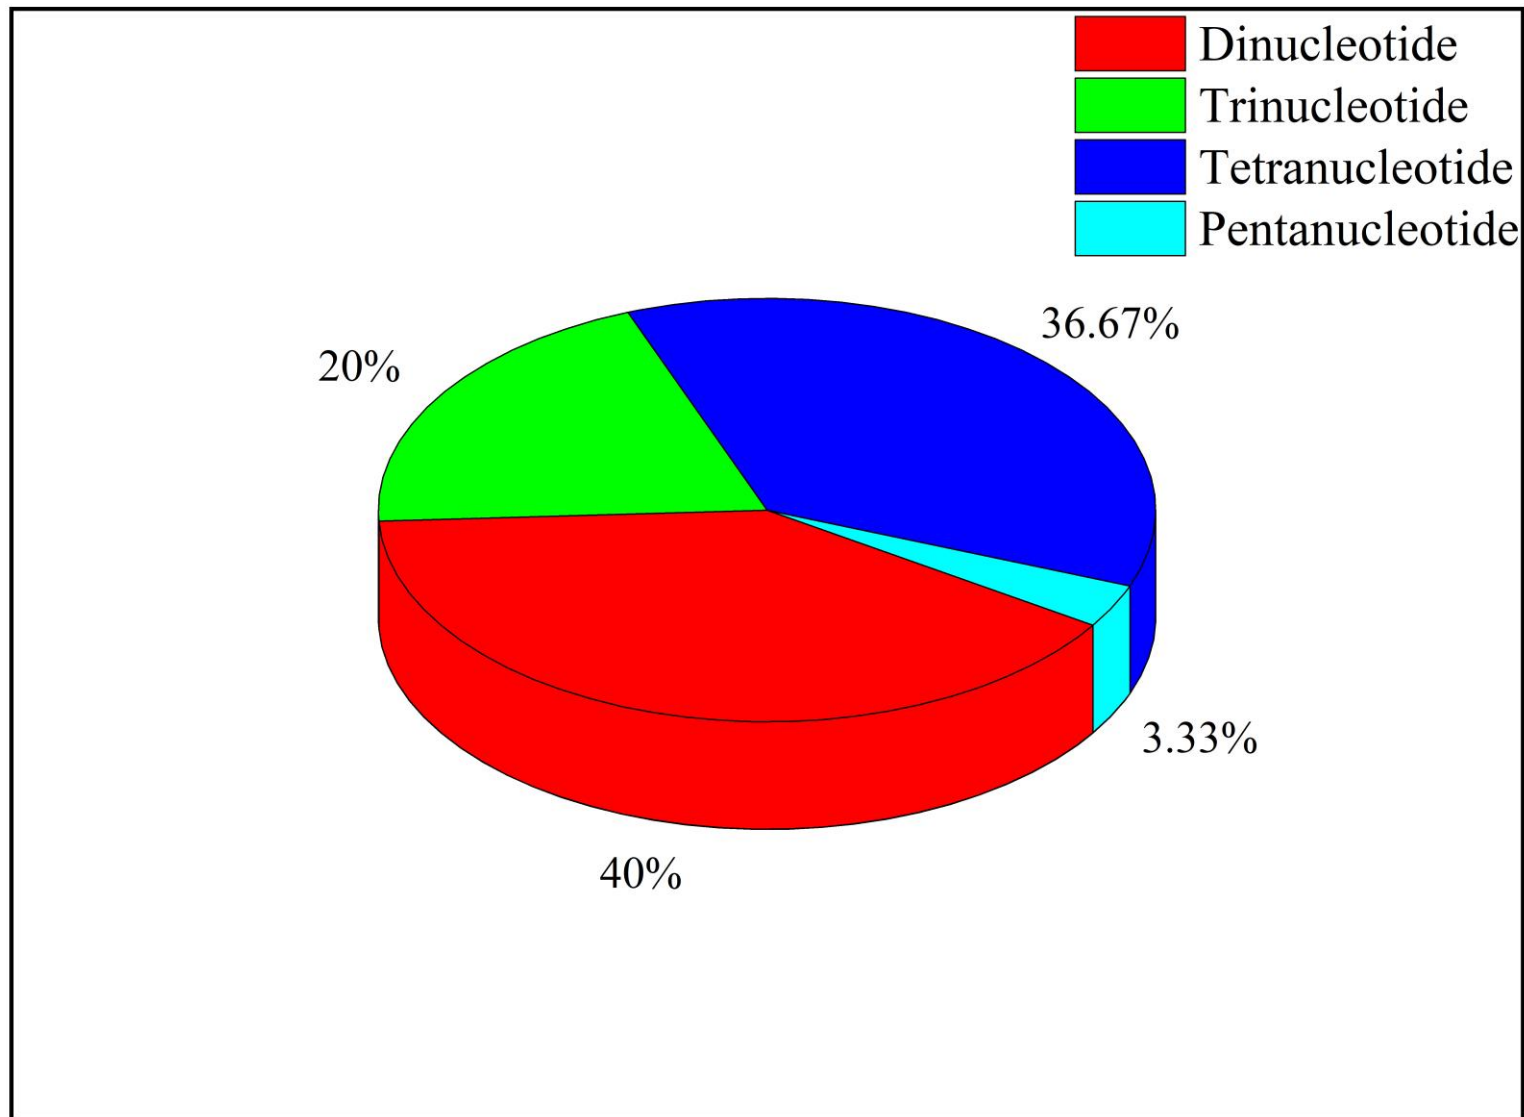

Supplement: 13205_2020_2555_MOESM7_ESM.pdf [file 13205_2020_2555_MOESM7_ESM.pdf]

# Protein-protein interaction network for the individual GmNHX protein

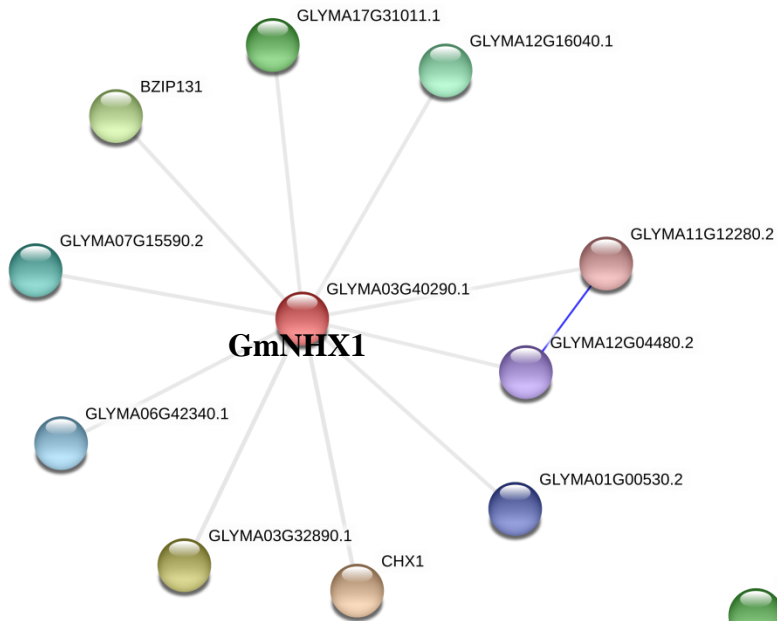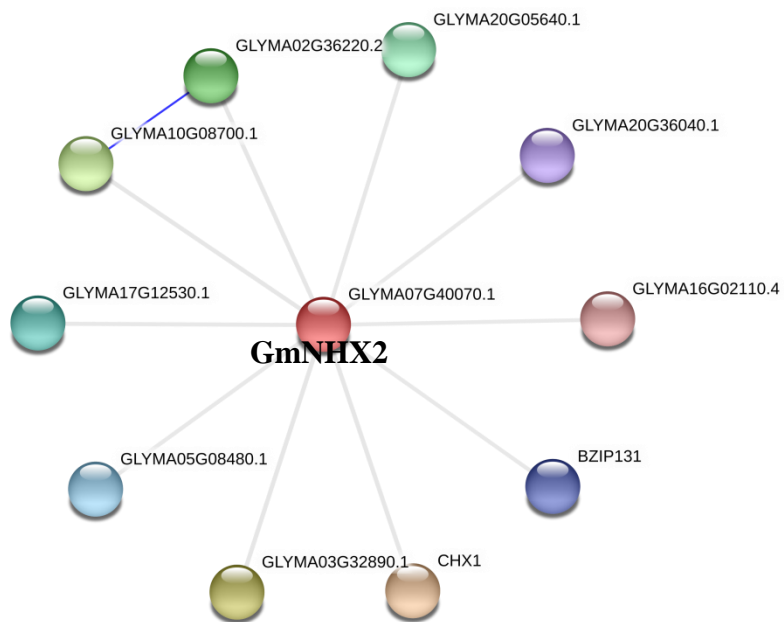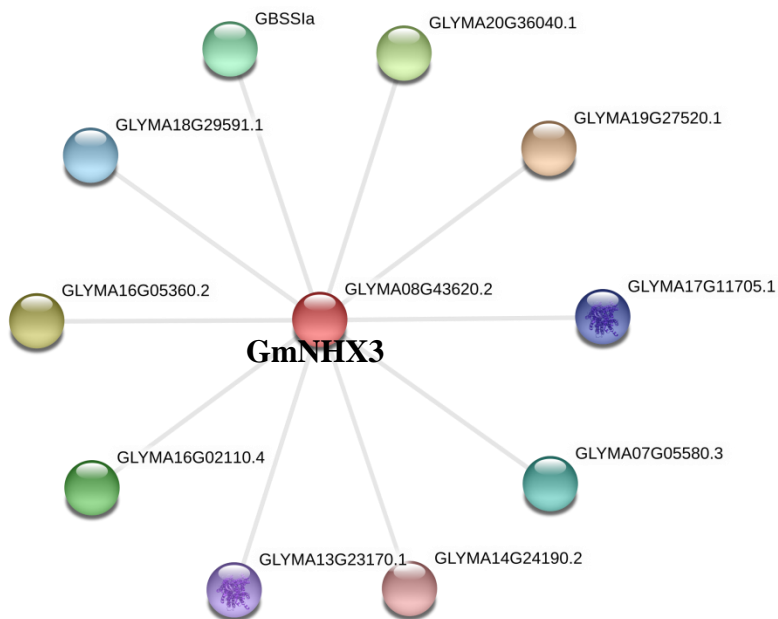

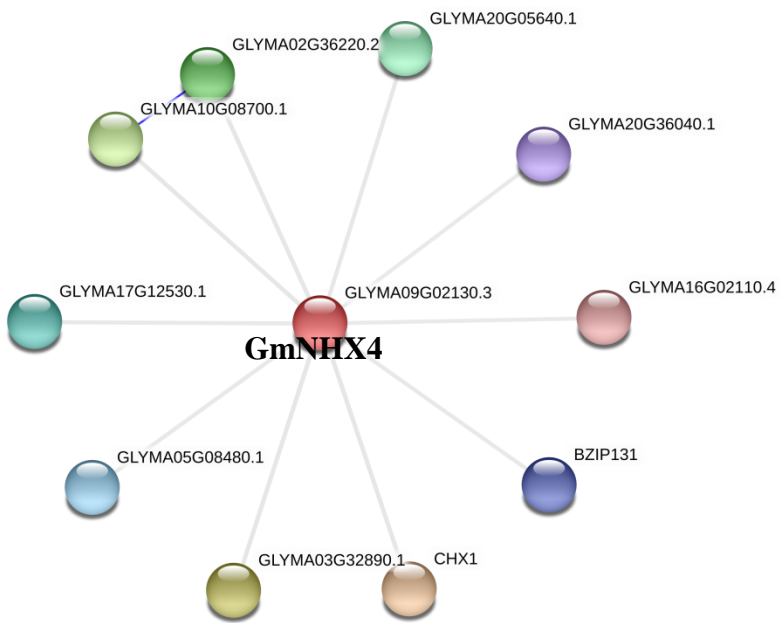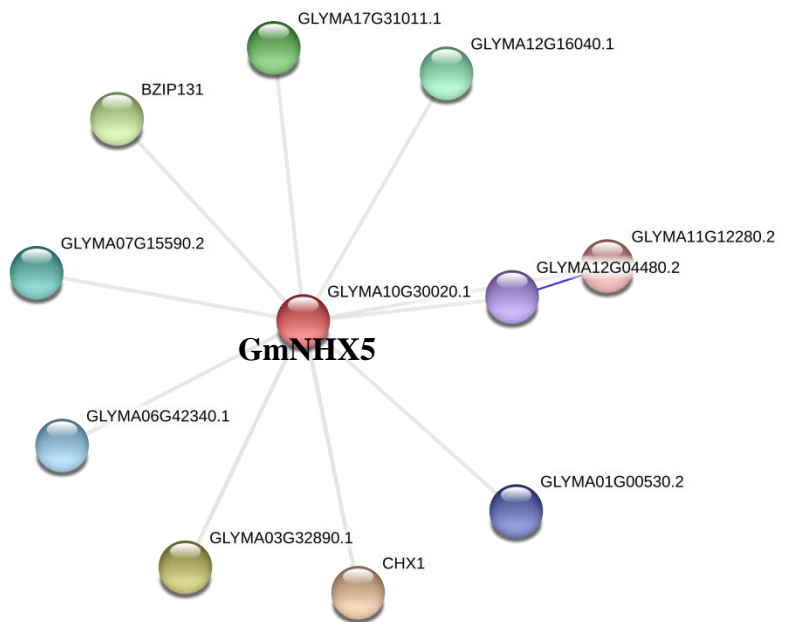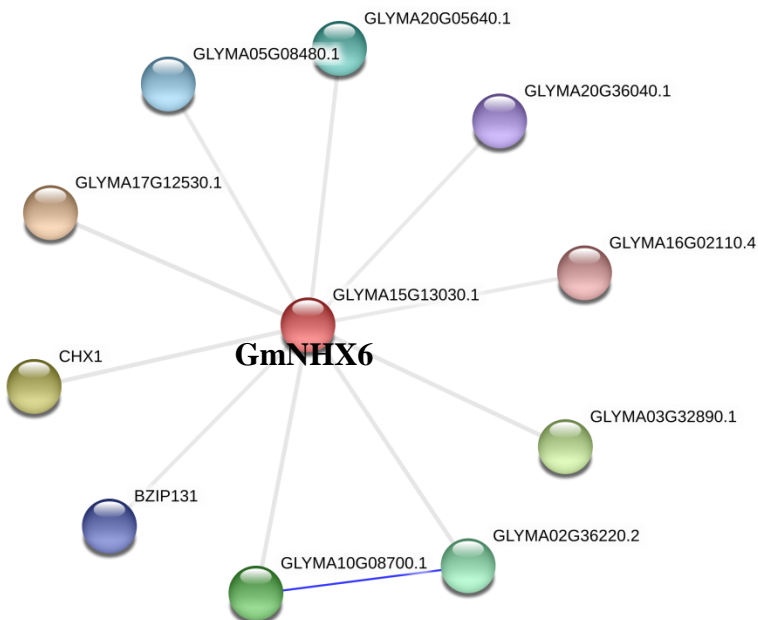

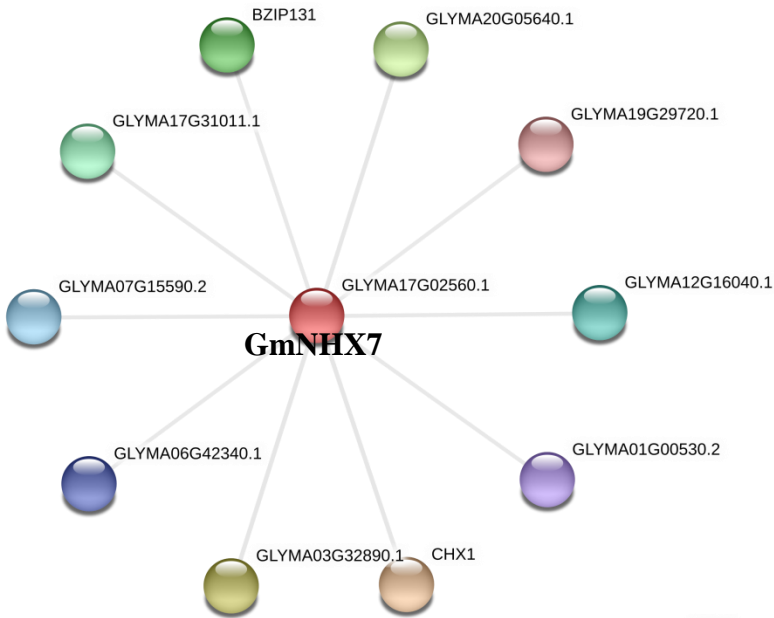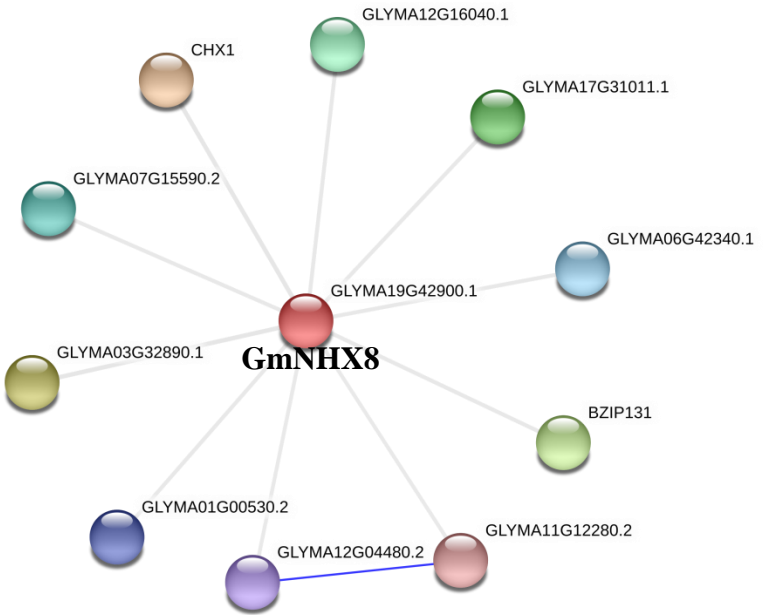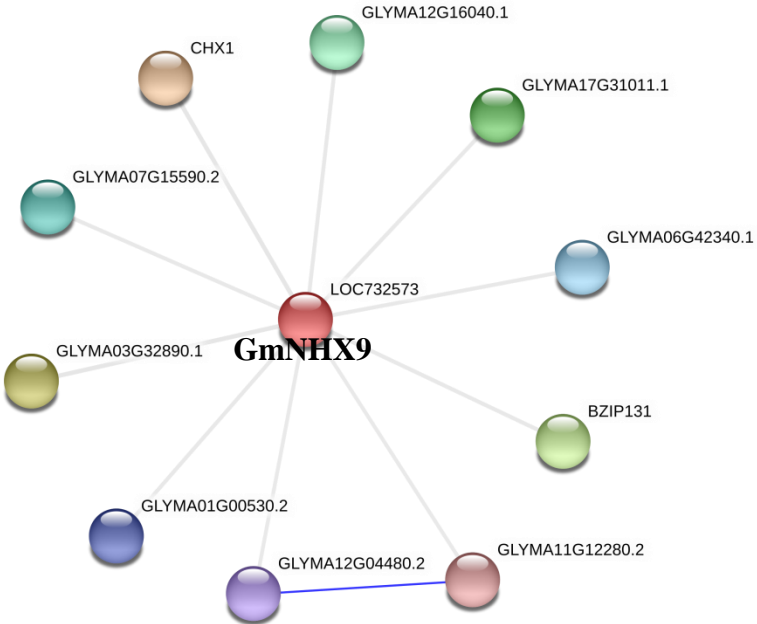

Supplement: 13205_2020_2555_MOESM8_ESM.pdf [file 13205_2020_2555_MOESM8_ESM.pdf]
